# Supplementary material
Source: ML conference proceedings conference paper supplement (https://openaccess.thecvf.com/content/ICCV2023/html/Shi_VideoFlow_Exploiting_Temporal_Cues_for_Multi-frame_Optical_Flow_Estimation_ICCV_2023_paper.html)
Supplement: Supplementary file 1 [file Shi_VideoFlow_Exploiting_Temporal_Cues_for_Multi-frame_Optical_Flow_Estimation_ICCV_2023_supplemental.pdf]

# VideoFlow: Supplementary Material

Xiaoyu Shi<sup>1,2</sup>    Zhaoyang Huang<sup>1,2\*</sup>    Weikang Bian<sup>1</sup>    Dasong Li<sup>1</sup>    Manyuan Zhang<sup>1</sup>  
Ka Chun Cheung<sup>2</sup>    Simon See<sup>2</sup>    Hongwei Qin<sup>3</sup>    Jifeng Dai<sup>4</sup>    Hongsheng Li<sup>1,5,6\*</sup>

<sup>1</sup>Multimedia Laboratory, The Chinese University of Hong Kong

<sup>2</sup>NVIDIA AI Technology Center    <sup>3</sup>SenseTime Research    <sup>4</sup>Tsinghua University

<sup>5</sup>Centre for Perceptual and Interactive Intelligence (CPII)    <sup>6</sup>Shanghai AI Laboratory

{xiaoyushi@link, drinkingcoder@link, hsli@ee}.cuhk.edu.hk

## 1. More Implementation Details

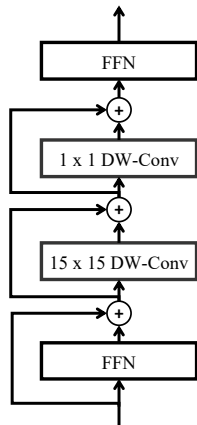

Figure 1. Network details of SKBlock.

Following SKFlow, we replace the vanilla convolutions with super-kernel blocks [5, 3] for all encoders. As shown in Figure 1, SKBlock utilizes large-kernel depth-wise convolutions to enlarge the receptive fields while maintaining low computational cost.

As shown in Table 1, we follow SKFlow to implement these modules. We simply concatenate the correlation feature and bi-directional flows along the channel as inputs to CorrEncoder and FlowEncoder, respectively. The MotionEncoder of TROF is the same as that of SKFlow. For MOP, it additionally takes the 144-dim concatenation of motion features as input and additionally outputs a 48-dim updated motion feature.

## 2. More Details About Training Data

Note that the KITTI benchmark provides 20-frame sequences and each sequence has one GT flow map between frames 10-11. Therefore, we use the same number of GT for training as other two-frame methods. Since only the FlyingThings dataset provides bi-directional ground-truth optical flows, for other datasets, we randomly flip the input sequence and ground-truth optical flows with a probability of 0.3 to supervise the predicted backward flows. We follow FlowFormer for other settings of data augmentation.

| Block       | CorrEncoder | FlowEncoder | MotionEncoder | Updater | FlowHead |
|-------------|-------------|-------------|---------------|---------|----------|
| Type        | SKBlock     | SKBlock     | SKBlock       | SKBlock | SKBlock  |
| Input Dim.  | 648         | 4           | 256           | 512     | 128      |
| Output Dim. | 192         | 64          | 124           | 128     | 4        |
| Hidden Dim. | 256         | 96          | 256           | 512     | 128      |

Table 1. Implementation details of encoders.

## 3. Online Mode v.s. Offline Mode

We conducted an experiment where only past frames are used (online setting). Our 5-frame VideoFlow achieves 4.08 Fl-all on the KITTI test set, outperforming 3-frame VideoFlow (4.44) and all previous two-frame methods. Specifically, we take KITTI images with indices 7, 8, 9, 10, 11 as inputs. The KITTI benchmark only evaluates the accuracy between images 10-11. The improvement reflects the superiority of VideoFlow in online setting.

## 4. Additional Qualitative Results

We provide additional visualisations in Figure 4, comparing our VideoFlow with previous best model FlowFormer++ [4, 2, 1].

## 5. Screenshots of Sintel Leaderboard

Figures 2 and 3 are the screenshots of evaluation results on the Sintel benchmarks. Our five-frame and three-frame models take the first and second places.

## References

- [1] Zhaoyang Huang, Xiaoyu Shi, Chao Zhang, Qiang Wang, Ka Chun Cheung, Hongwei Qin, Jifeng Dai, and Hongsheng Li. Flowformer: A transformer architecture for optical flow. *arXiv preprint arXiv:2203.16194*, 2022. 1
- [2] Zhaoyang Huang, Xiaoyu Shi, Chao Zhang, Qiang Wang, Yijin Li, Hongwei Qin, Jifeng Dai, Xiaogang Wang, and Hongsheng Li. Flowformer: A transformer architecture and its masked cost volume autoencoding for optical flow. *arXiv preprint arXiv:2306.05442*, 2023. 1

\*Corresponding author: Zhaoyang Huang and Hongsheng Li

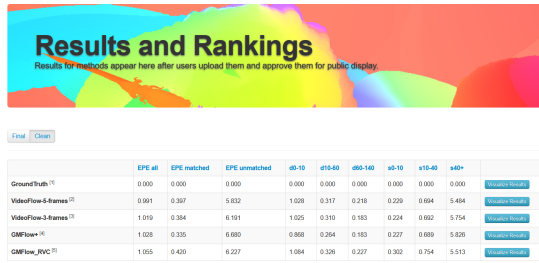

Figure 2. Screenshot of Sintel (Clean) leaderboard.

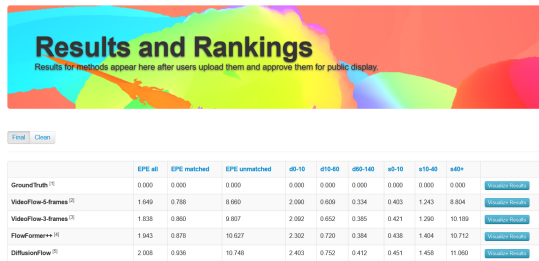

Figure 3. Screenshot of Sintel (Final) leaderboard.

- [3] Dasong Li, Xiaoyu Shi, Yi Zhang, Ka Chun Cheung, Simon See, Xiaogang Wang, Hongwei Qin, and Hongsheng Li. A simple baseline for video restoration with grouped spatial-temporal shift. In *Proceedings of the IEEE/CVF Conference on Computer Vision and Pattern Recognition (CVPR)*, pages 9822–9832, June 2023. [1](#)
- [4] Xiaoyu Shi, Zhaoyang Huang, Dasong Li, Manyuan Zhang, Ka Chun Cheung, Simon See, Hongwei Qin, Jifeng Dai, and Hongsheng Li. Flowformer++: Masked cost volume auto-encoding for pretraining optical flow estimation. *arXiv preprint arXiv:2303.01237*, 2023. [1](#)
- [5] Shangkun Sun, Yuanqi Chen, Yu Zhu, Guodong Guo, and Ge Li. Skflow: Learning optical flow with super kernels. *arXiv preprint arXiv:2205.14623*, 2022. [1](#)

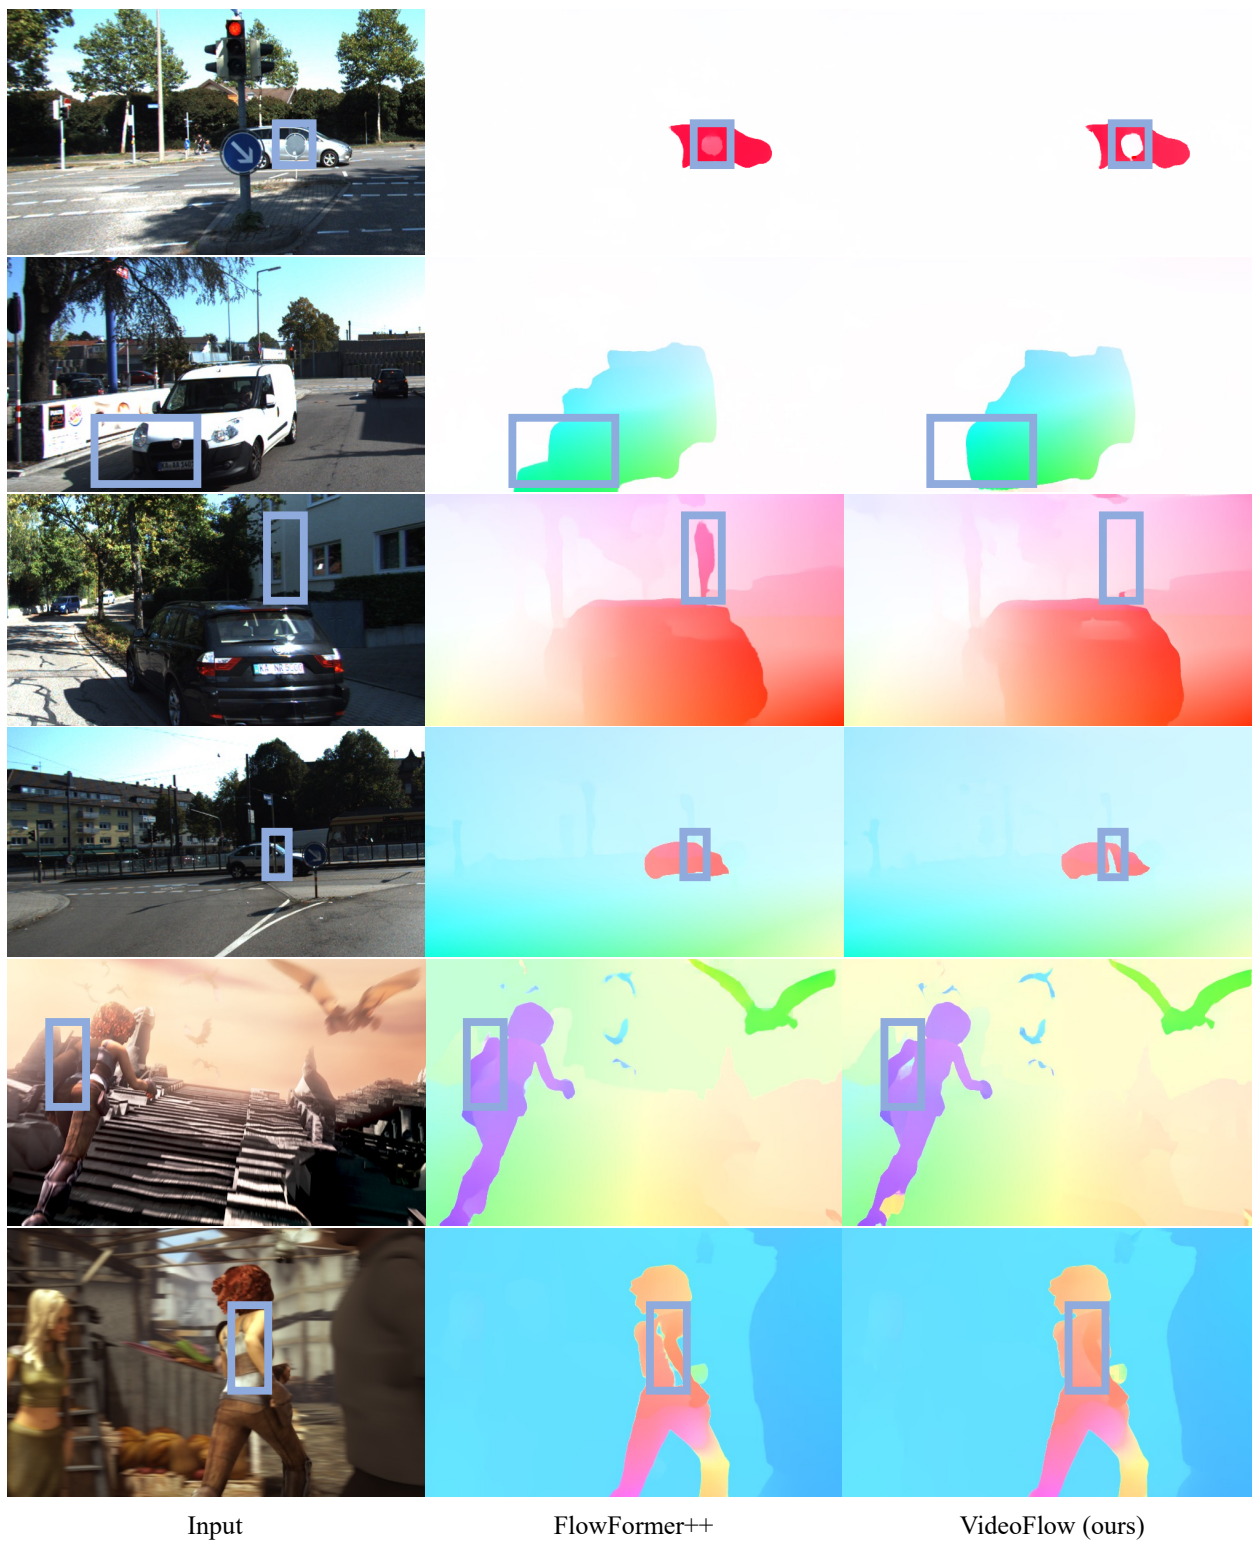

Figure 4. VideoFlow can better distinguish foreground and background objects and is more robust to noise such as light reflection.
